# Supplementary material for: BAP1 Malignant Pleural Mesothelioma Mutations in Caenorhabditis elegans Reveal Synthetic Lethality between ubh-4/BAP1 and the Proteasome Subunit rpn-9/PSMD13
Source: MDPI journal article supplement (doi:10.3390/cells12060929), 2023-03-18
Supplement: s1 [file s1]

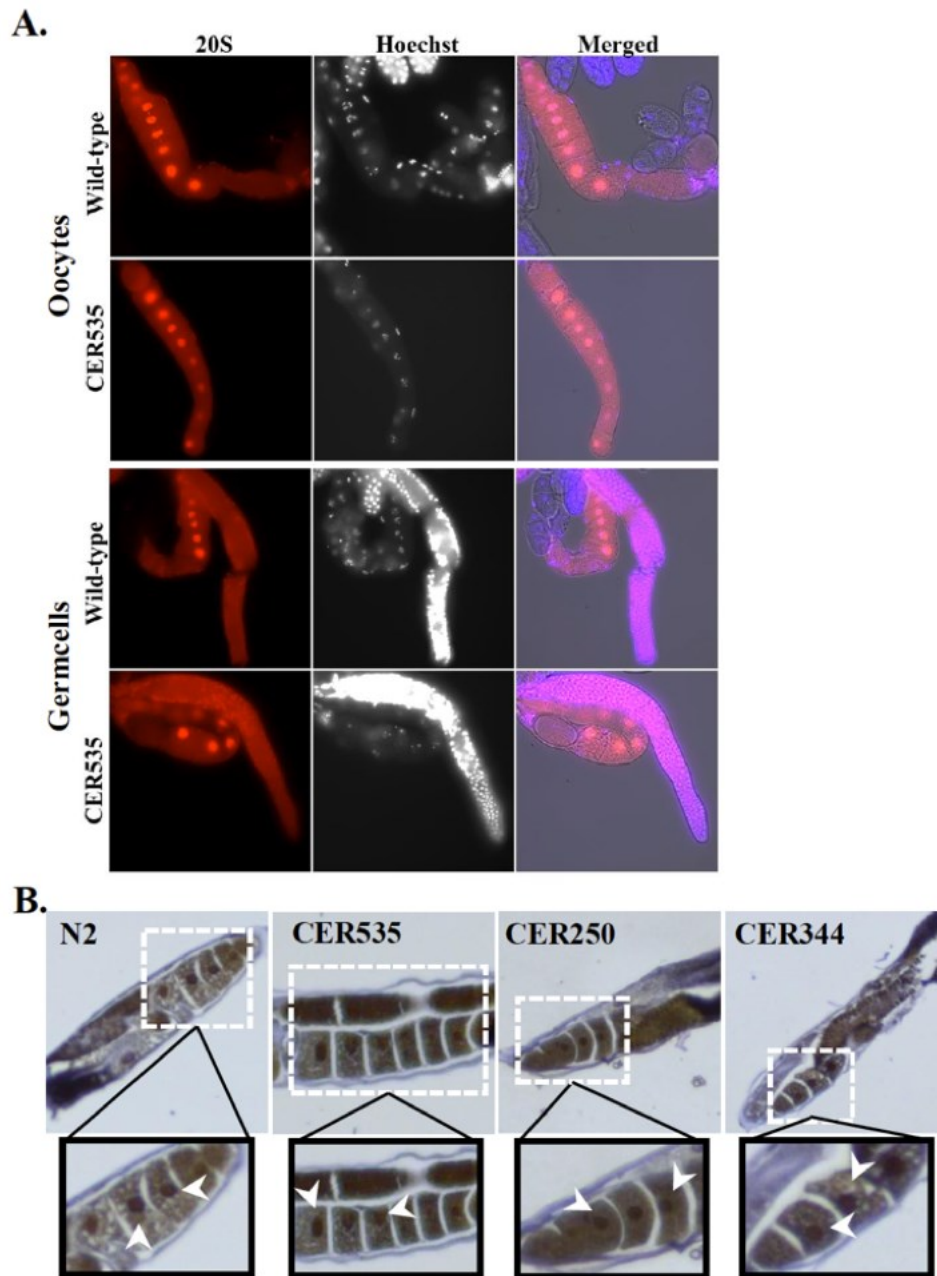

**Supplementary Figure S1. *ubh-4* mutations do not affect the tissue expression of the proteasome.** A. Representative micrographs of proteasome immunostaining (20S Ab) in dissected oocytes (upper panels) and germlines (lower panels, indicated by white arrowheads) of wild-type and *ubh-4* deletion (CER535 animals). B. Images representing proteasome immunoreactivity of wild-type and *ubh-4* mutant animals in the oocytes upon immunohistochemical staining with 20S Ab (oocytes are indicated by white arrowheads).

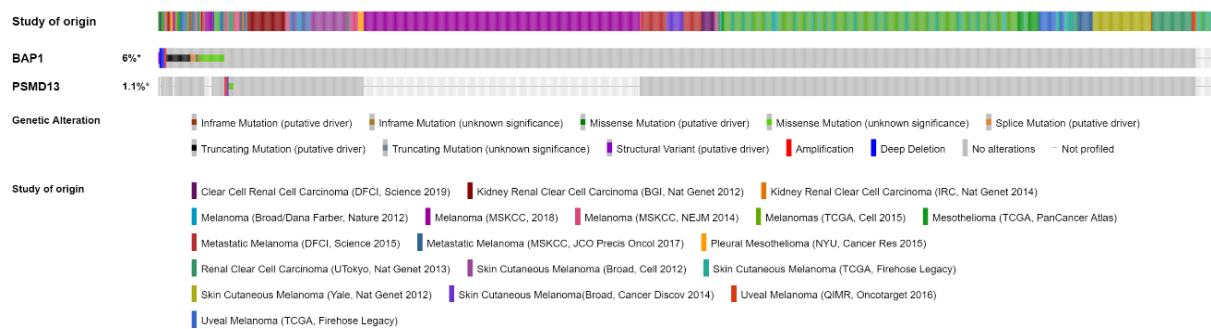

**Supplementary Figure S2: Genetic alterations in *BAP1* and *PSMD13* do not cooccur in *BAP1*-TPDS related cancers.** Schematic representation of genetic alteration types affecting *BAP1* or *PSMD13* in a total of 2680 studies including melanoma, mesothelioma, and clear-cell renal carcinoma samples. Data collected from cBioportal <sup>57,62</sup>.
